# Supplementary material for: Structures of monomeric and dimeric PRC2:EZH1 reveal flexible modules involved in chromatin compaction
Source: PubMed Central journal article supplement (PMC7846606; doi:10.1038/s41467-020-20775-z), 2021-01-29

## Supplementary data

### Supplementary Fig. 1: Single-particle cryo-EM analysis of the PRC2:EZH1–AEBP2 complex.

**a**, Cryo-EM micrograph area of vitrified PRC2:EZH1–AEBP2 complex. Scale bar: 500 nm. **b**, 2D-class averages of the PRC2:EZH1–AEBP2 complex obtained with RELION-2.1. Side length of individual averages: 23 nm. **c**, 3D classification used to generate the reference maps for supervised 3D classification. **d**, Image-processing workflow for 3D classification and refinement in RELION-2.1 that resulted in a density map at 4.1-Å resolution. See Materials and Methods for details.

### Supplementary Fig. 2: Single-particle cryo-EM analysis of the PRC2:EZH1–AEBP2–JARID2 complex.

**a**, Cryo-EM micrograph area of vitrified PRC2:EZH1–AEBP2–JARID2 complex. Scale bar: 500 nm. **b**, 2D-class averages of the PRC2:EZH1–AEBP2–JARID2 complex obtained with RELION-2.1. Side length of individual averages: 23 nm. **c**, Image-processing workflow for 3D classification and refinement in RELION-2.1 that resulted in two density maps at 3.9-Å resolution. See Materials and Methods for details.

### Supplementary Fig. 3: Quality assessment for the PRC2:EZH1 map.

**a**, FSC curves calculated from independently refined half maps for the PRC2:EZH1–AEBP2 complex (blue), the monomeric PRC2:EZH1–AEBP2–JARID2 complex (green), and the combined dataset of the PRC2:EZH1–AEBP2 and monomeric PRC2:EZH1–AEBP2–JARID2 complexes (orange). **b**, The local resolution map for the map obtained with the combined datasets of the PRC2:EZH1–AEBP2 and monomeric PRC2:EZH1–AEBP2–JARID2 complexes. **c**, FSC comparison of the model of the monomeric PRC2:EZH1 with density maps. The combined map was used for model building, but only half map 1 was used for model refinement. **d**, Left: 3.9-Å resolution cryo-EM map of PRC2:EZH1 showing the upper and lower lobes. Right: Model built into the 3.9-Å resolution map. Subunits are colored and indicated. **e**, Representative cryo-EM densities for the 3.9-Å resolution map obtained with the combined datasets of the PRC2:EZH1–AEBP2 and monomeric PRC2:EZH1–AEBP2–JARID2 complexes. Top row, from left to right: EED, residues 170-176; EED, residues 183-191; EED, residues 193-200; SUZ12, residues 561-568; SUZ12, residues 589-602; RBAP48, residues 6-29. Bottom row, left to right: RBAP48, residues 396-404; RBAP48, residues 376-383; RBAP48, residues 31-40; RBAP48, residues 319-326; AEBP2, residues 399-418; SUZ12, residues 97-107. **f**, Comparison of the AEBP2 structure from our monomeric PRC2:EZH1–AEBP2–JARID2 (purple) complex with PDB: 6C24 (cyan) and PDB: 5WAI (green). **g**, Fit of our AEBP2 model into the cryo-EM density.

### Supplementary Fig. 4: Regulatory domains of EZH1 are flexible.

**a**, Cartoon representation of domains that are visible in the cryo-EM density of EZH1. **b**, Depiction of the key unstructured loops in EZH1. Labels indicate the last structured residues flanking the flexible loops in EZH1. **c**, Sequence comparison of the flexible loops in EZH1 and EZH2. Underlined sequences represent regions rich in basic (blue) or acidic residues (red), RNA-interaction domains (purple), and automethylation sites (green). Acidic

or basic regions are based on manual inspection of the EZH1/2 sequences. RNA-interaction domains and automethylation sites are based on reports describing EZH2 features<sup>63-66</sup>.

**Supplementary Fig. 5: Single-particle cryo-EM analysis of the PRC2:EZH1–nucleosome complex.**

**a**, Cryo-EM micrograph area of vitrified PRC2:EZH1–nucleosome complex. Scale bar: 500 nm. **b**, 2D-class averages of the PRC2:EZH1–nucleosome complex obtained with cryoSPARC. Side length of individual averages: 42 nm. **c**, Signal subtraction was used to isolate components of the PRC2:EZH1–nucleosome complex for further refinement in RELION-3.0. **d**, 3D classification without alignment of signal-subtracted particles. Number of particles in each class and estimated resolution of the maps are indicated. Boxes indicate classes that were chosen for final refinement and postprocessing in RELION-3.0.

**Supplementary Fig. 6: Quality assessment for the PRC2:EZH1 component maps.**

**a**, FSC curve calculated from independently refined half maps for PRC2A (left panel) and local resolution map (right panel). **b**, FSC curve calculated from independently refined half maps for PRC2B (left panel) and local resolution map (right panel). **c**, FSC curve calculated from independently refined half maps for nucleosome (left panel) and local resolution map (right panel). **d**, Overall (left panel) and zoomed-in view (right panel) of histone H3 tail interaction with EZH1 SET domain. **e**, Overall (left panel) and zoomed-in view (right panel) of proposed site of SUZ12 helix/DNA interaction. SUZ12 amino acids 80-107 comprising an  $\alpha$ -helix are colored in magenta.

**Supplementary Fig. 7: Specificity of PRC2:EZH1<sub>5RtoA</sub> mutant complex.**

**a**, Nucleosome-binding activity of 4-component PRC2:EZH1 complexes (EZH1, SUZ12, EED, and RBAP48) containing the indicated version of EZH1. Left panel: wild-type EZH1, middle panel: R31,64,100,321,443A mutant EZH1 (5 random R to A), right panel: R360-364A mutant EZH1 (5RtoA). All reactions contain 25 nM core nucleosomes and the indicated amount of PRC2:EZH1. Reactions were repeated twice and gave similar results. **b**, Methyltransferase activity of indicated concentrations of PRC2:EZH1 complexes. Each data point is the average of three replicates and is shown as mean  $\pm$  standard deviation.

**Supplementary Fig. 8: Comparison of PRC2 dimer interfaces seen by cryo-EM and X-ray crystallography.**

**a**, View of the C2 domain–RBAP48 interaction in our structure of the PRC2:EZH1 monomer. **b**, View of the "domain swapped" C2 domain–RBAP48 interaction in our structure of the nucleosome-bound PRC2:EZH1 dimer. **c**, Comparison of the PRC2:EZH1 dimerization interface in our structure of the nucleosome-bound PRC2:EZH1 dimer (orange and green) with that in the crystal structure of the PRC2 lower lobe (PDB: 6NQ3; grey). Note that for clarity only the C2 and RBAP48 domains are shown from our structure. RBAP48\_A from 6NQ3 is aligned to RBAP48\_A from our structure. Note that the C2\_A domains pivot approximately 37° using the basic loop as an anchor. Note that the RBAP48\_B domains are rotated relative to each other.

**Supplementary Fig. 9: Purification of PRC2:EZH1 monomers and dimers.**

**a**, Gel-filtration profile of PRC2:EZH1 demonstrating separation of dimer and monomer peak fractions. **b**, SEC-MALS of a mixture of PRC2:EZH1 dimers and monomers. Expected and observed sizes for the PRC2:EZH1 fractions are indicated. **c**, Negative-stain EM 2D-class averages of the PRC2:EZH1 dimer peak obtained with RELION-3.0. Side length of individual averages: 58 nm. **d**, Gel-filtration profiles of PRC2:EZH1 (left panel), PRC2:EZH1 dimer peak reinjected after a 24-hr incubation at 4°C (middle panel), and PRC2:EZH1 monomer peak reinjected after a 24-hr incubation at 4°C (right panel).

**Supplementary Fig. 10: Biochemical activity of PRC2:EZH1 monomers and dimers.**

**a**, Gel-filtration profiles and SDS-PAGE gels of PRC2:EZH1 with wild-type or mutant SUZ12 containing amino acids 193-197 mutated to alanine (SUZ12<sub>193-197</sub>). Elution volumes are indicated in parentheses. Results were repeated with an independent preparation of mutant SUZ12 and gave similar results. **b**, Nucleosome-binding activity of the peak fractions from panel a. All reactions contain 12.5 nM core nucleosomes and the indicated amount of PRC2:EZH1. Reactions were repeated twice and gave similar results. **c**, Bioluminescence-based methyltransferase assay (MTase-Glo) showing relative activity of indicated PRC2:EZH1 complexes. Each data point is the average of three replicates and is shown as mean  $\pm$  standard deviation. **d**, Confocal micrographs of serial 2-fold dilutions of PRC2:EZH1 mixed with nucleosome arrays showing the compaction of chromatin into droplets. Scale bar: 100  $\mu$ m. Molarity is based on the expected size of PRC2:EZH1 monomers. All samples contain 3  $\mu$ M total nucleosomes, assembled into arrays with 12 nucleosomes spaced 40 bp apart. Reactions were repeated twice with independent samples and gave similar results.

**Supplementary Fig. 11: Comparison of PRC2:EZH1/2 dimers.**

**a**, Gel-filtration profiles of PRC2:EZH1–AEBP2–JARID2 or PRC2:EZH2–AEBP2–JARID2 with dimer and monomer peaks labeled. **b**, Confocal micrographs of serial 2-fold dilutions of PRC2:EZH1 and PRC2:EZH2 dimers mixed with nucleosome arrays showing compaction of chromatin into droplets. Scale bar: 100  $\mu$ m. Molarity is based on the expected size of PRC2:EZH1/2 monomers. All samples contain 3  $\mu$ M total nucleosomes, assembled into arrays with 12 nucleosomes spaced 40 bp apart. Reactions were repeated three times with independent samples and gave similar results.

Supplementary Fig. 1: Single-particle cryo-EM analysis of the PRC2:EZH1-AEBP2 complex.

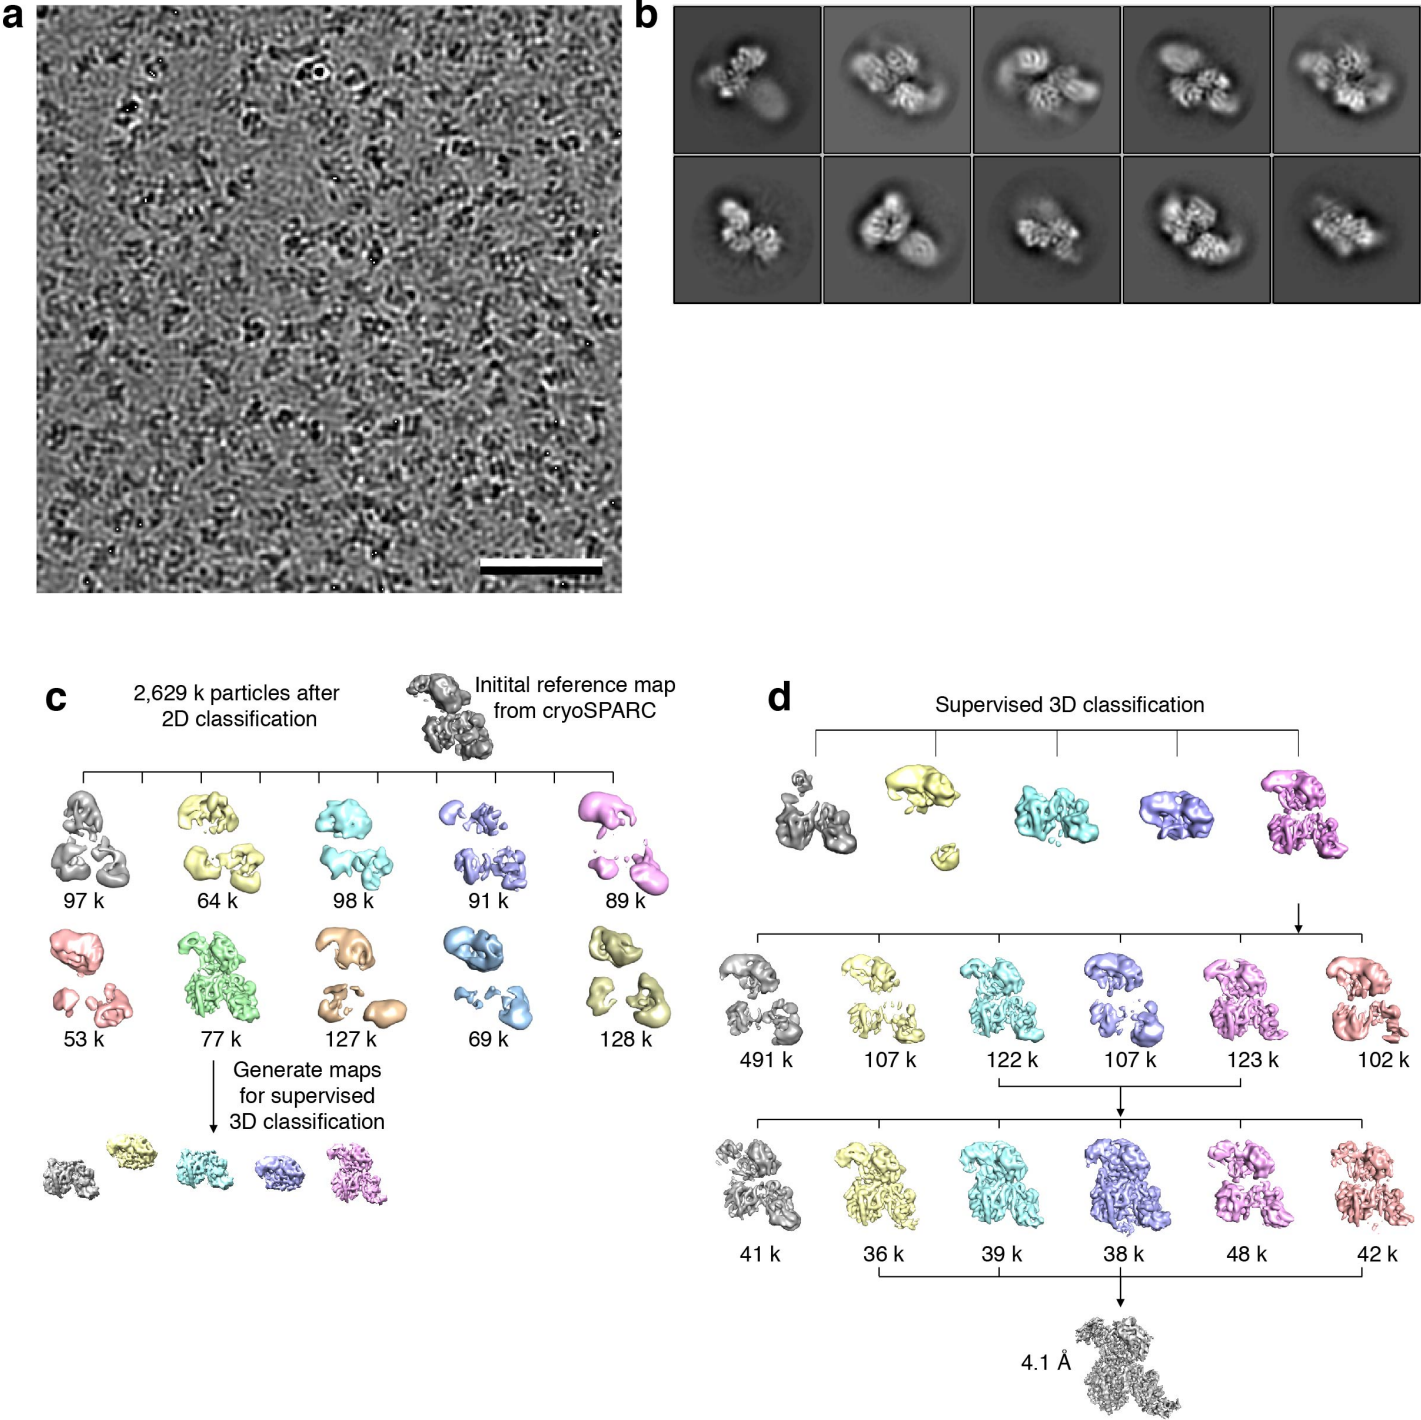

Supplementary Fig. 2: Single-particle cryo-EM analysis of the PRC2:EZH1-AEBP2-JARID2 complex.

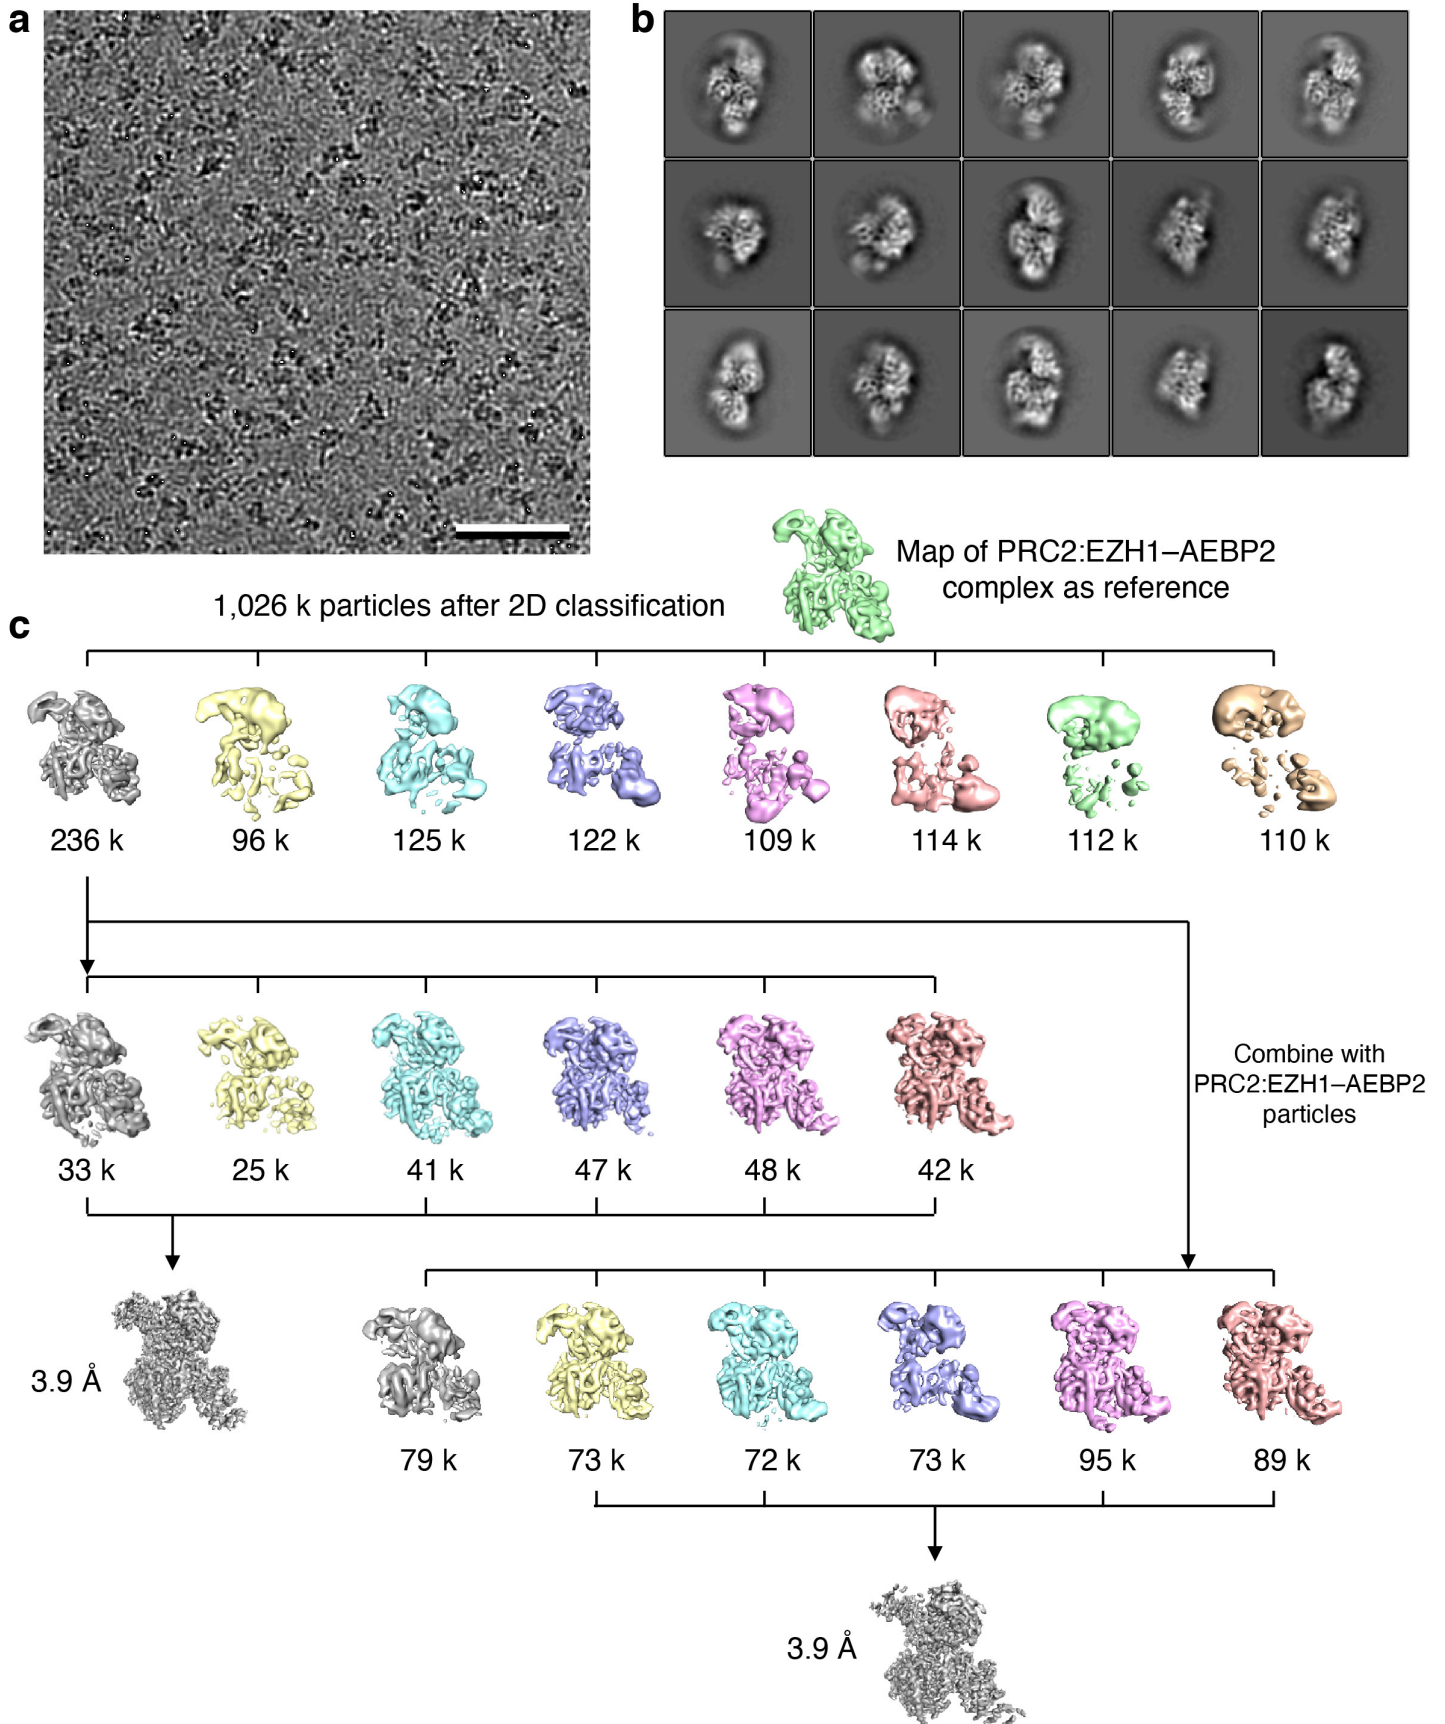

# Supplementary Fig. 3: Quality assessment for the PRC2:EZH1 map.

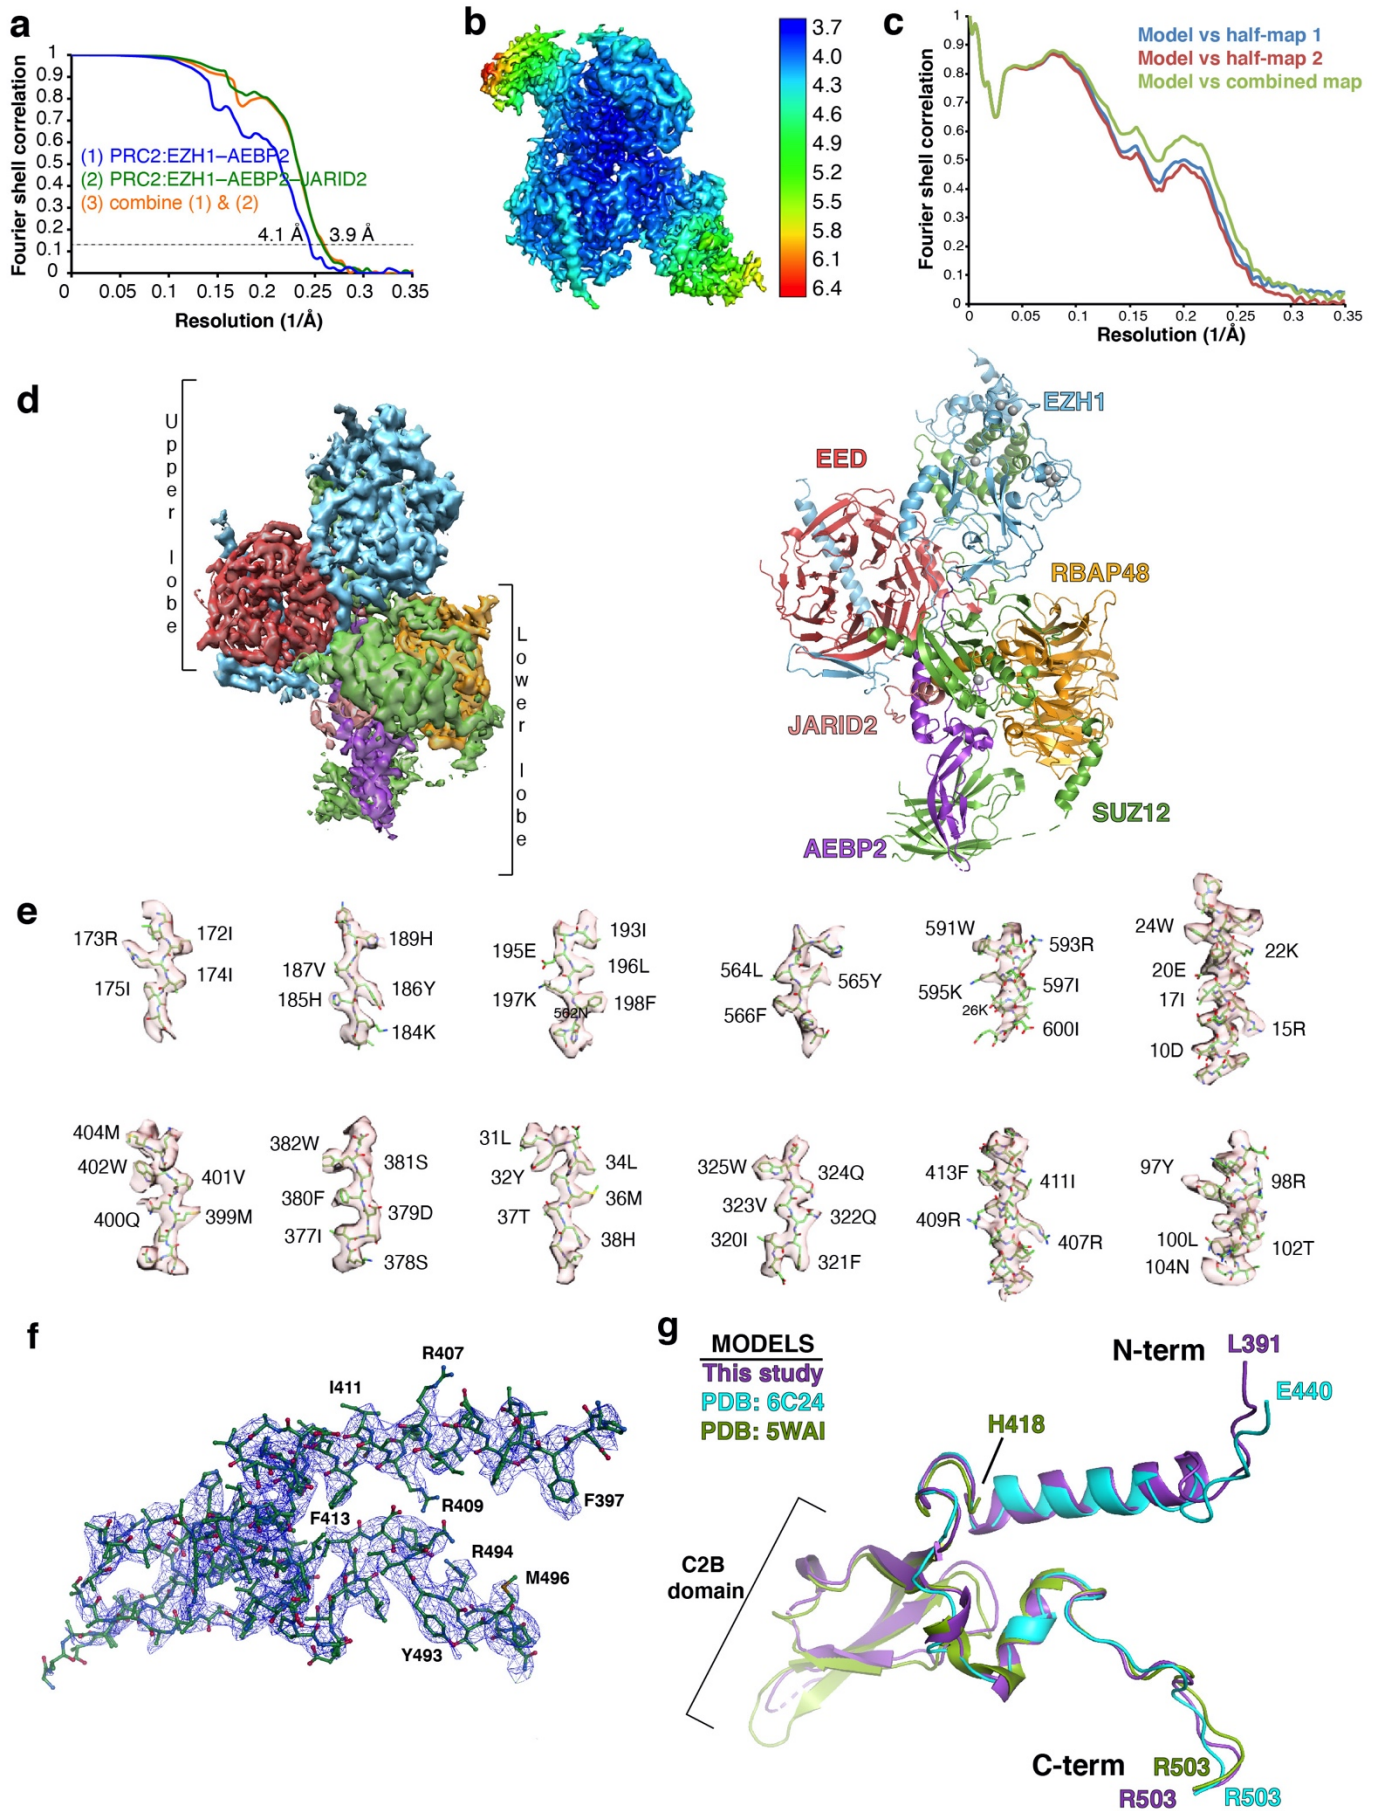

# Supplementary Fig. 4: Regulatory domains of EZH1 are flexible.

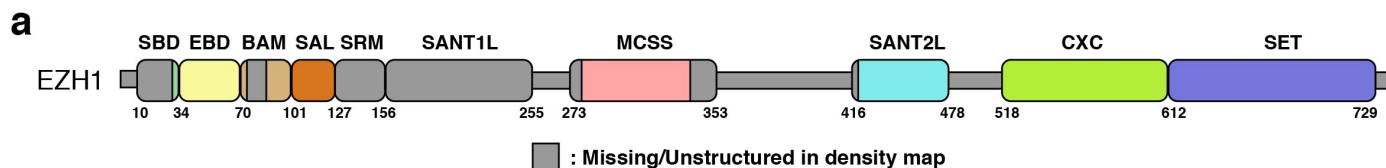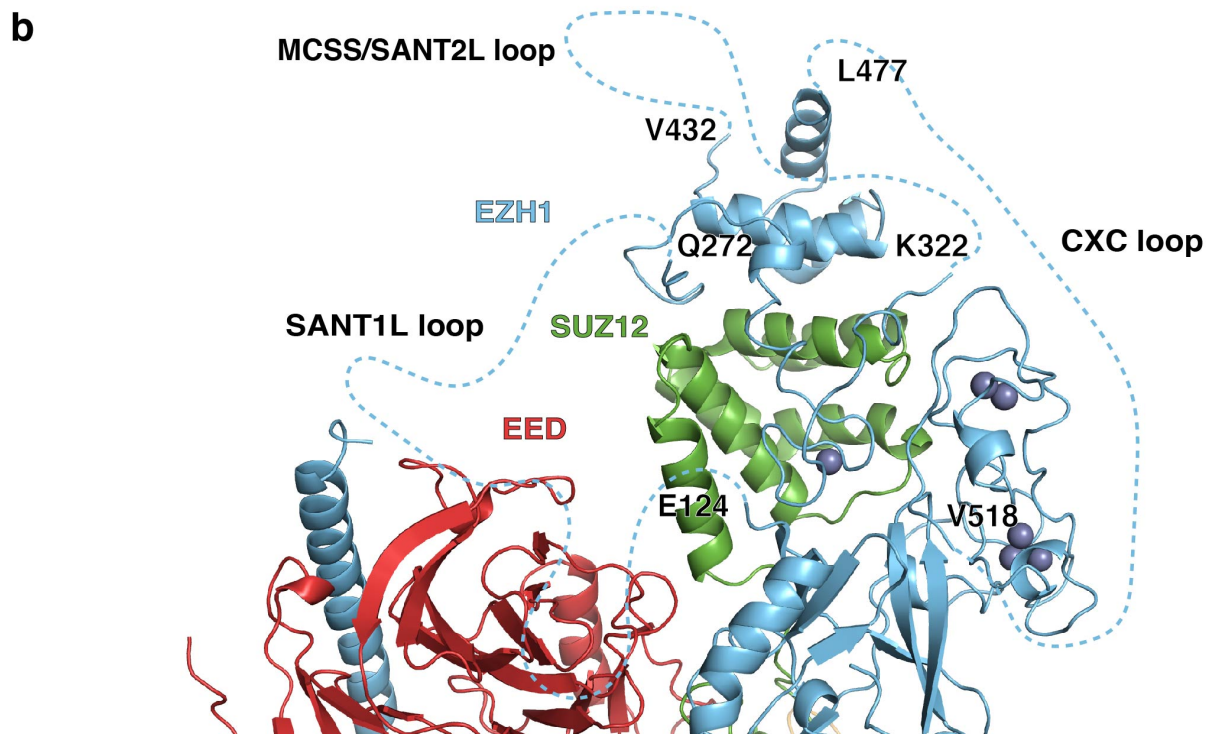

**c**

**SANT1L loop (S1L)**

|             |     |       |              |      |               |       |           |              |      |     |
|-------------|-----|-------|--------------|------|---------------|-------|-----------|--------------|------|-----|
| EZH1_SANT1L | 125 | DETVL | CNIPYMGDEVK  | EEDE | TFIEELINNYDGK | VHGEE | EMIPGSVLT | SDAVFLELVD   | DALN | 184 |
| EZH2_SANT1L | 124 | DETVL | HNIPYMGDEVLD | DDG  | TFIEELIKNYDGK | VHGDR | EC----    | GFINDEIFVELV | NALG | 179 |

  

|             |     |      |           |          |      |      |          |        |       |      |        |         |     |     |
|-------------|-----|------|-----------|----------|------|------|----------|--------|-------|------|--------|---------|-----|-----|
| EZH1_SANT1L | 185 | QYS  | DEEEEGHND | TSDGKQDD | SKE  | DL   | PVTRKRKR | HAI    | EGNK  | ---- | KSSKKQ | FPNDMIF | SAI | 240 |
| EZH2_SANT1L | 180 | QYND | DDDDDDGDD | PEEREKQ  | K-DL | ---- | EDHR     | DDKESR | PPRKF | PSDK | KIFEAI |         | 227 |     |

  

|             |     |      |      |       |       |       |      |        |  |     |
|-------------|-----|------|------|-------|-------|-------|------|--------|--|-----|
| EZH1_SANT1L | 241 | ASMF | PEN  | GVPDD | MKERY | RELTE | MSDP | PNALPP |  | 271 |
| EZH2_SANT1L | 228 | SSMF | PKGT | AEEEL | KEKY  | KELTE | QQLP | GALPP  |  | 258 |

**MCSS/SANT2L loop (MS2L)**

|             |     |       |      |      |    |    |      |       |       |       |      |      |       |       |      |      |     |     |      |     |
|-------------|-----|-------|------|------|----|----|------|-------|-------|-------|------|------|-------|-------|------|------|-----|-----|------|-----|
| EZH1_SANT2L | 323 | NKEIK | IEPE | PCGT | DC | FL | LEGA | KEYAM | ----- | LHN   | PR   | SKCS | GRRRR | RHHIV | SASC | SNAS | 376 |     |      |     |
| EZH2_SANT2L | 310 | NTET  | ALDN | KPC  | FP | QC | YQ   | HEGA  | KEFA  | AALTA | ERIK | TP   | PKR   | PG    | RRR  | GRLP | NN  | SRP | STP- | 368 |

  

|             |     |      |     |     |    |     |    |     |     |       |     |      |    |    |    |    |    |    |     |    |     |      |    |    |    |    |    |    |    |    |     |
|-------------|-----|------|-----|-----|----|-----|----|-----|-----|-------|-----|------|----|----|----|----|----|----|-----|----|-----|------|----|----|----|----|----|----|----|----|-----|
| EZH1_SANT2L | 377 | ASAV | AET | KEG | DS | DRD | TG | N   | DWA | ----- | SSS | SEAN | SR | CQ | TP | TK | OK | AS | PAP | PQ | 421 |      |    |    |    |    |    |    |    |    |     |
| EZH2_SANT2L | 369 | TINV | LES | KD  | T  | DS  | DR | EAG | T   | ET    | GG  | EN   | ND | K  | EE | E  | K  | K  | DE  | T  | SSS | SEAN | SR | CQ | TP | TK | MM | PN | IE | PE | 428 |

  

|             |     |     |      |    |    |     |     |
|-------------|-----|-----|------|----|----|-----|-----|
| EZH1_SANT2L | 422 | LCV | VEAP | S  | -P | 431 |     |
| EZH2_SANT2L | 429 | NVE | WS   | -G | A  | S   | 438 |

**CXC loop**

|          |     |      |    |    |     |    |    |   |     |    |    |    |   |    |    |    |   |   |   |   |   |   |   |   |   |   |     |
|----------|-----|------|----|----|-----|----|----|---|-----|----|----|----|---|----|----|----|---|---|---|---|---|---|---|---|---|---|-----|
| EZH1_CXC | 478 | ILKL | P  | T  | DEL | MN | PS | Q | KKR | KH | RL | LW | A | AH | CR | KI | Q | L | K | K | D | N | S | S | T | Q | 517 |
| EZH2_CXC | 477 | IAP  | PA | ED | V   | D  | T  | P | PKR | KH | RL | LW | A | AH | CR | KI | Q | L | K | K | D | G | S | S | N | H | 516 |

- █ : basic patch
- █ : acidic patch
- █ : automethylation sites
- █ : RNA-interaction domain

**Supplementary Fig. 5: Single-particle cryo-EM analysis of the PRC2:EZH1–nucleosome complex.**

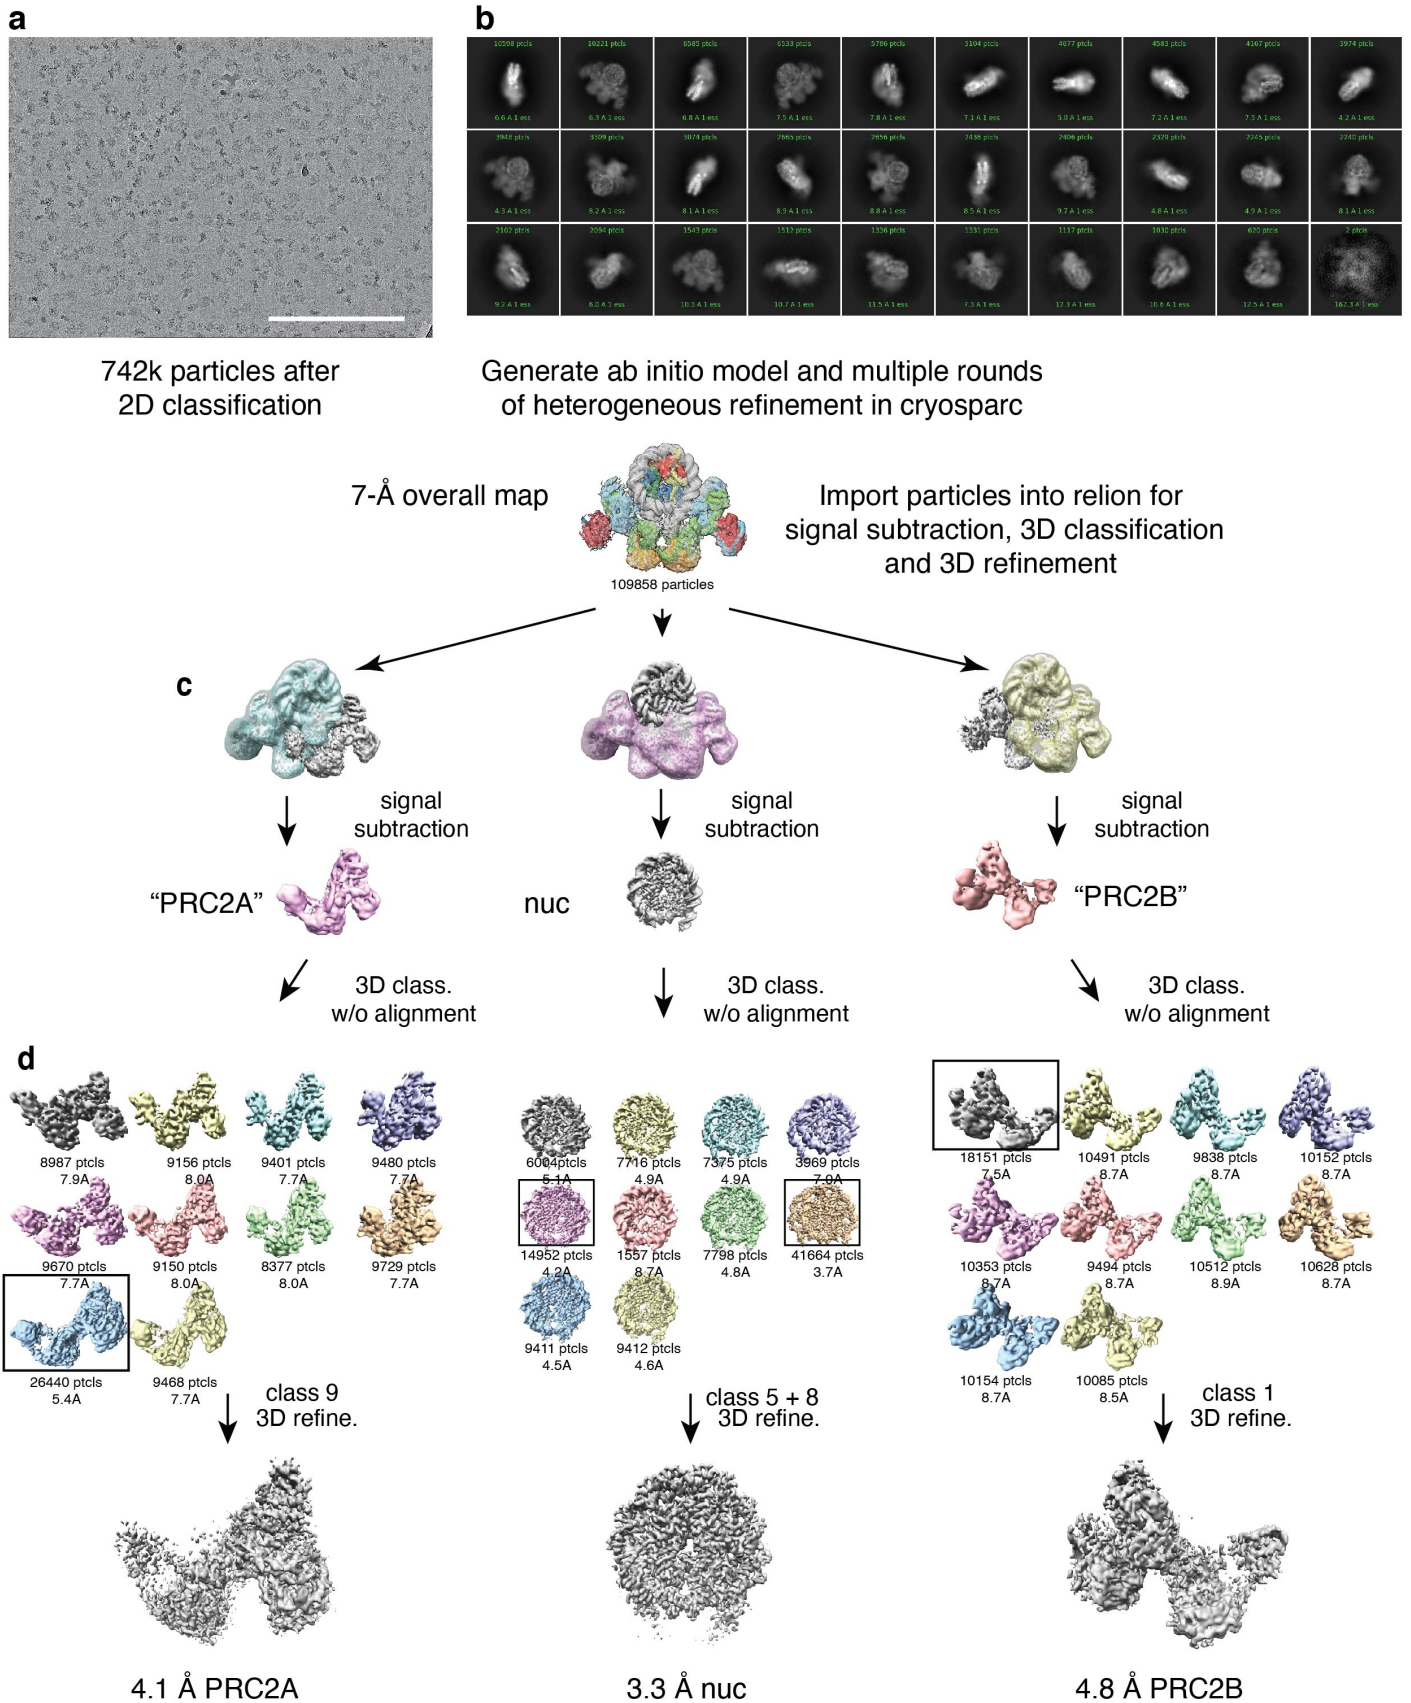



Supplementary Fig. 6: Quality assessment for the PRC2:EZH1 component maps.

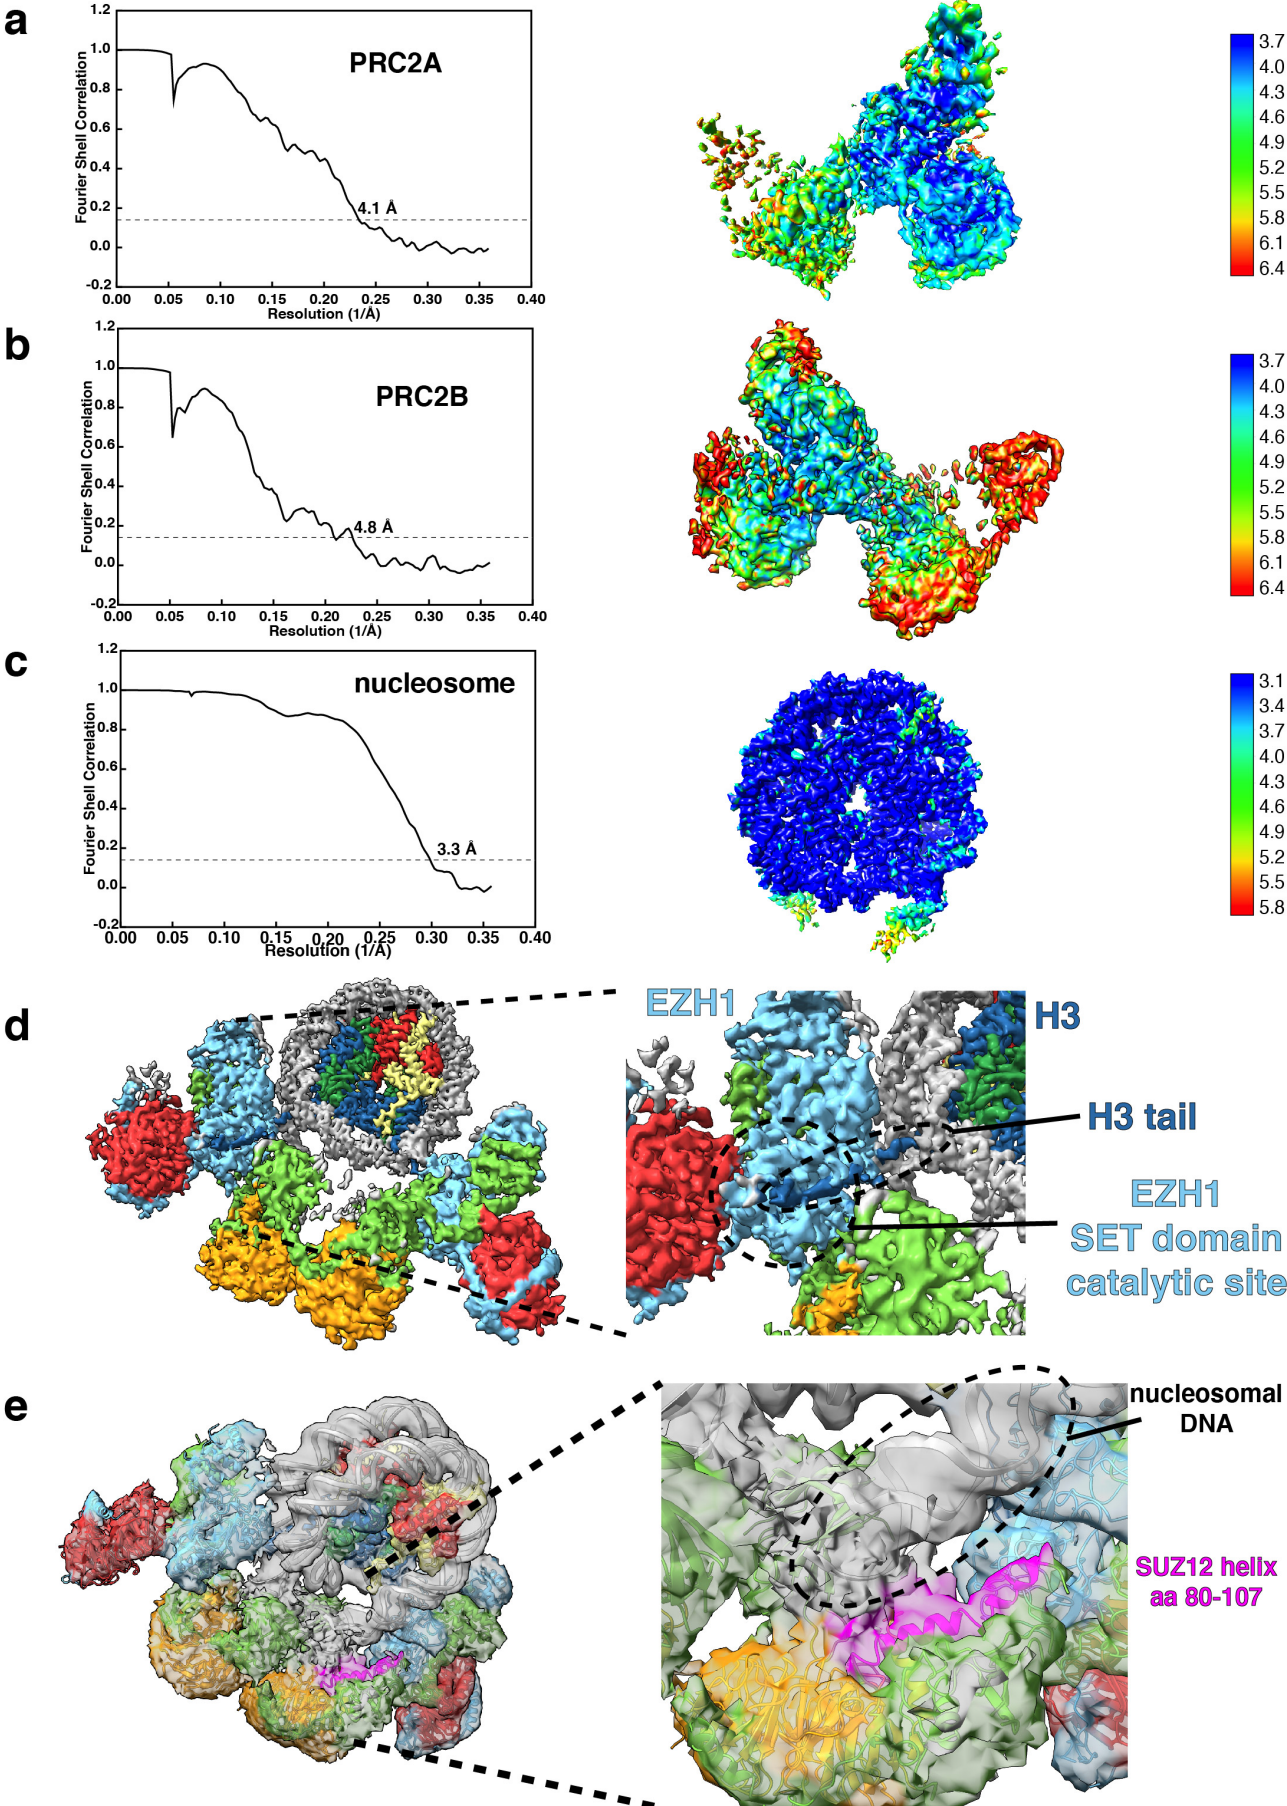

# Supplementary Fig. 7: Specificity of PRC2:EZH1<sub>5RtoA</sub> mutant complex.

## a Nucleosome-binding activity of PRC2:EZH1

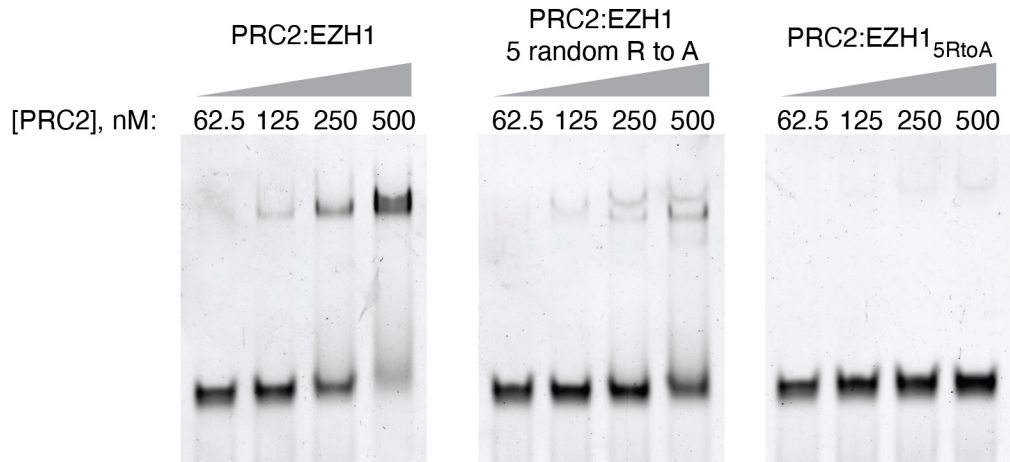

## b Methyltransferase activity

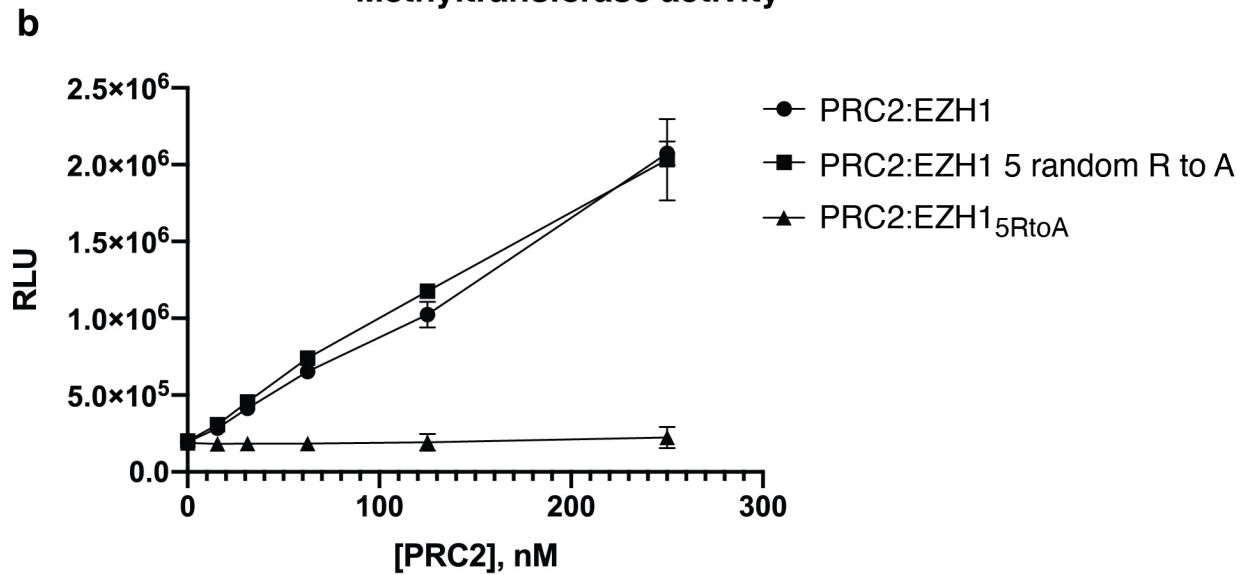

Supplementary Fig. 8: Comparison of PRC2 dimer interfaces seen by cryo-EM and X-ray crystallography.

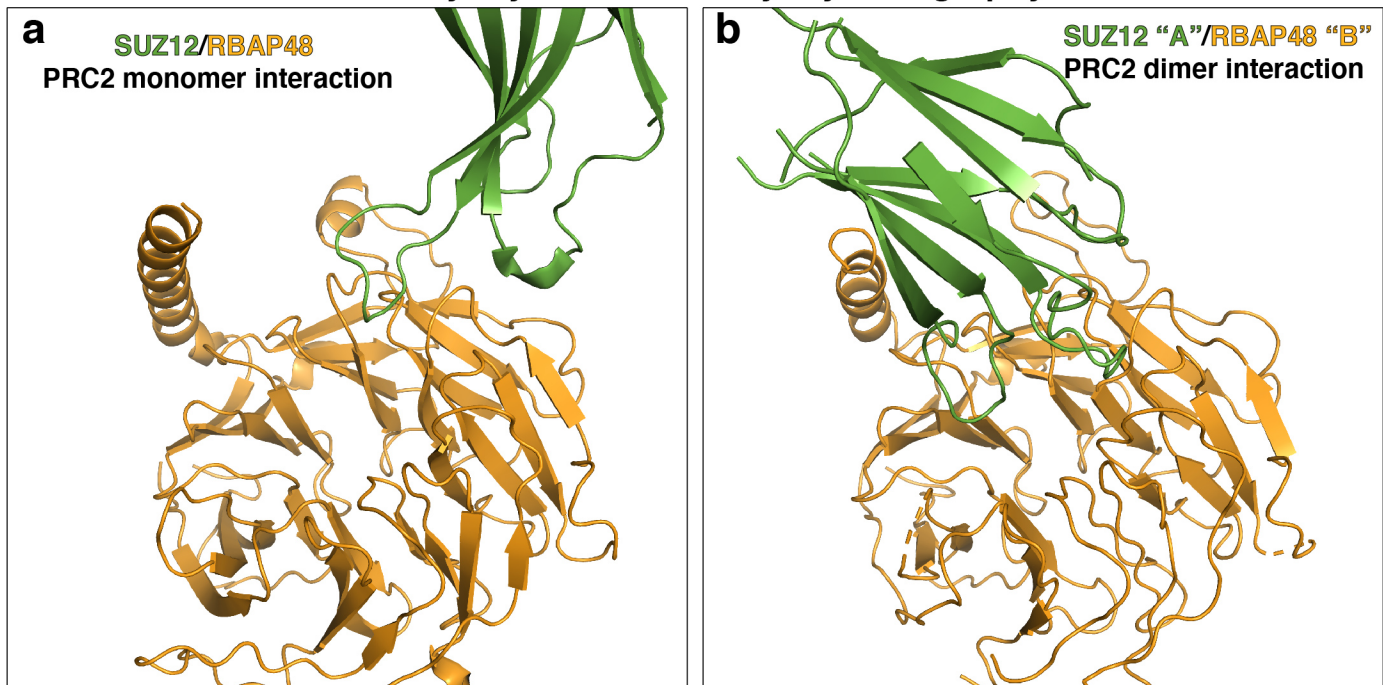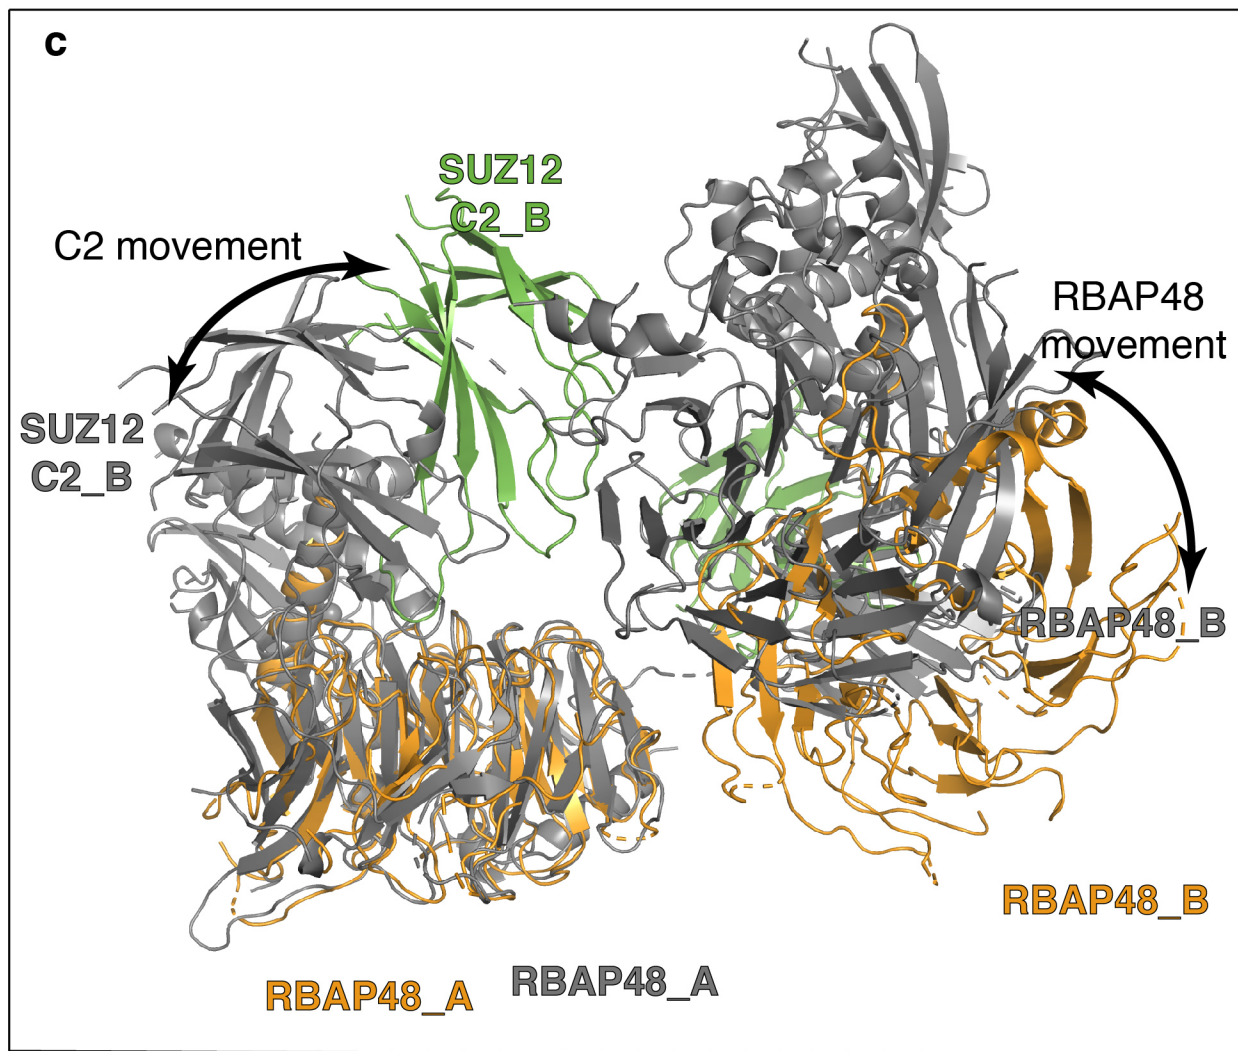

**Supplementary Fig. 9: Purification of PRC2:EZH1 monomers and dimers.**

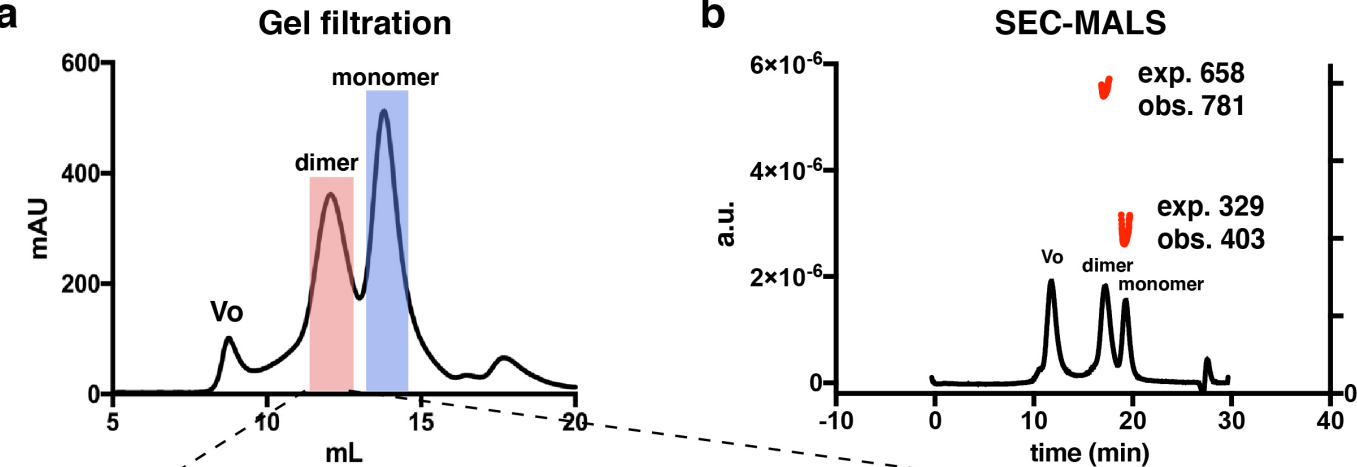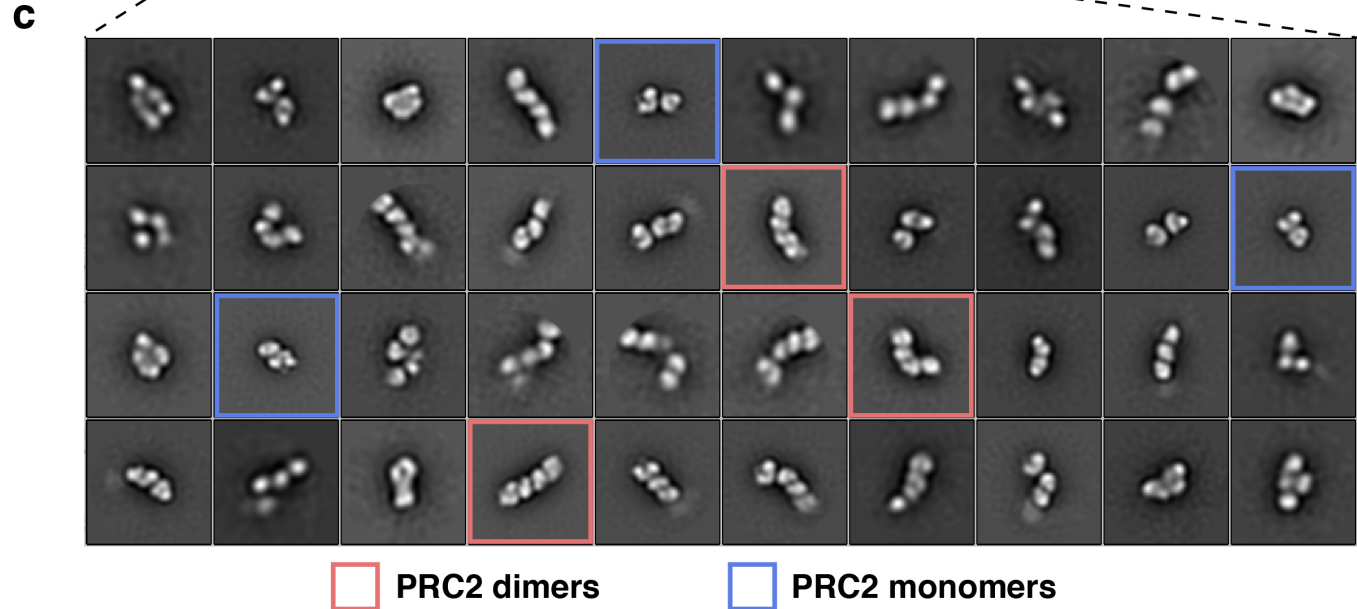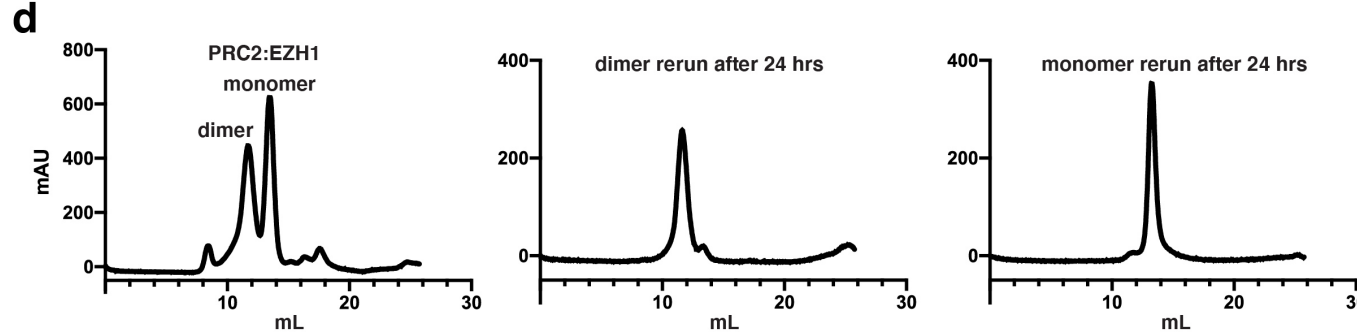

Supplementary Fig. 10: Biochemical activity of PRC2:EZH1 monomers and dimers.

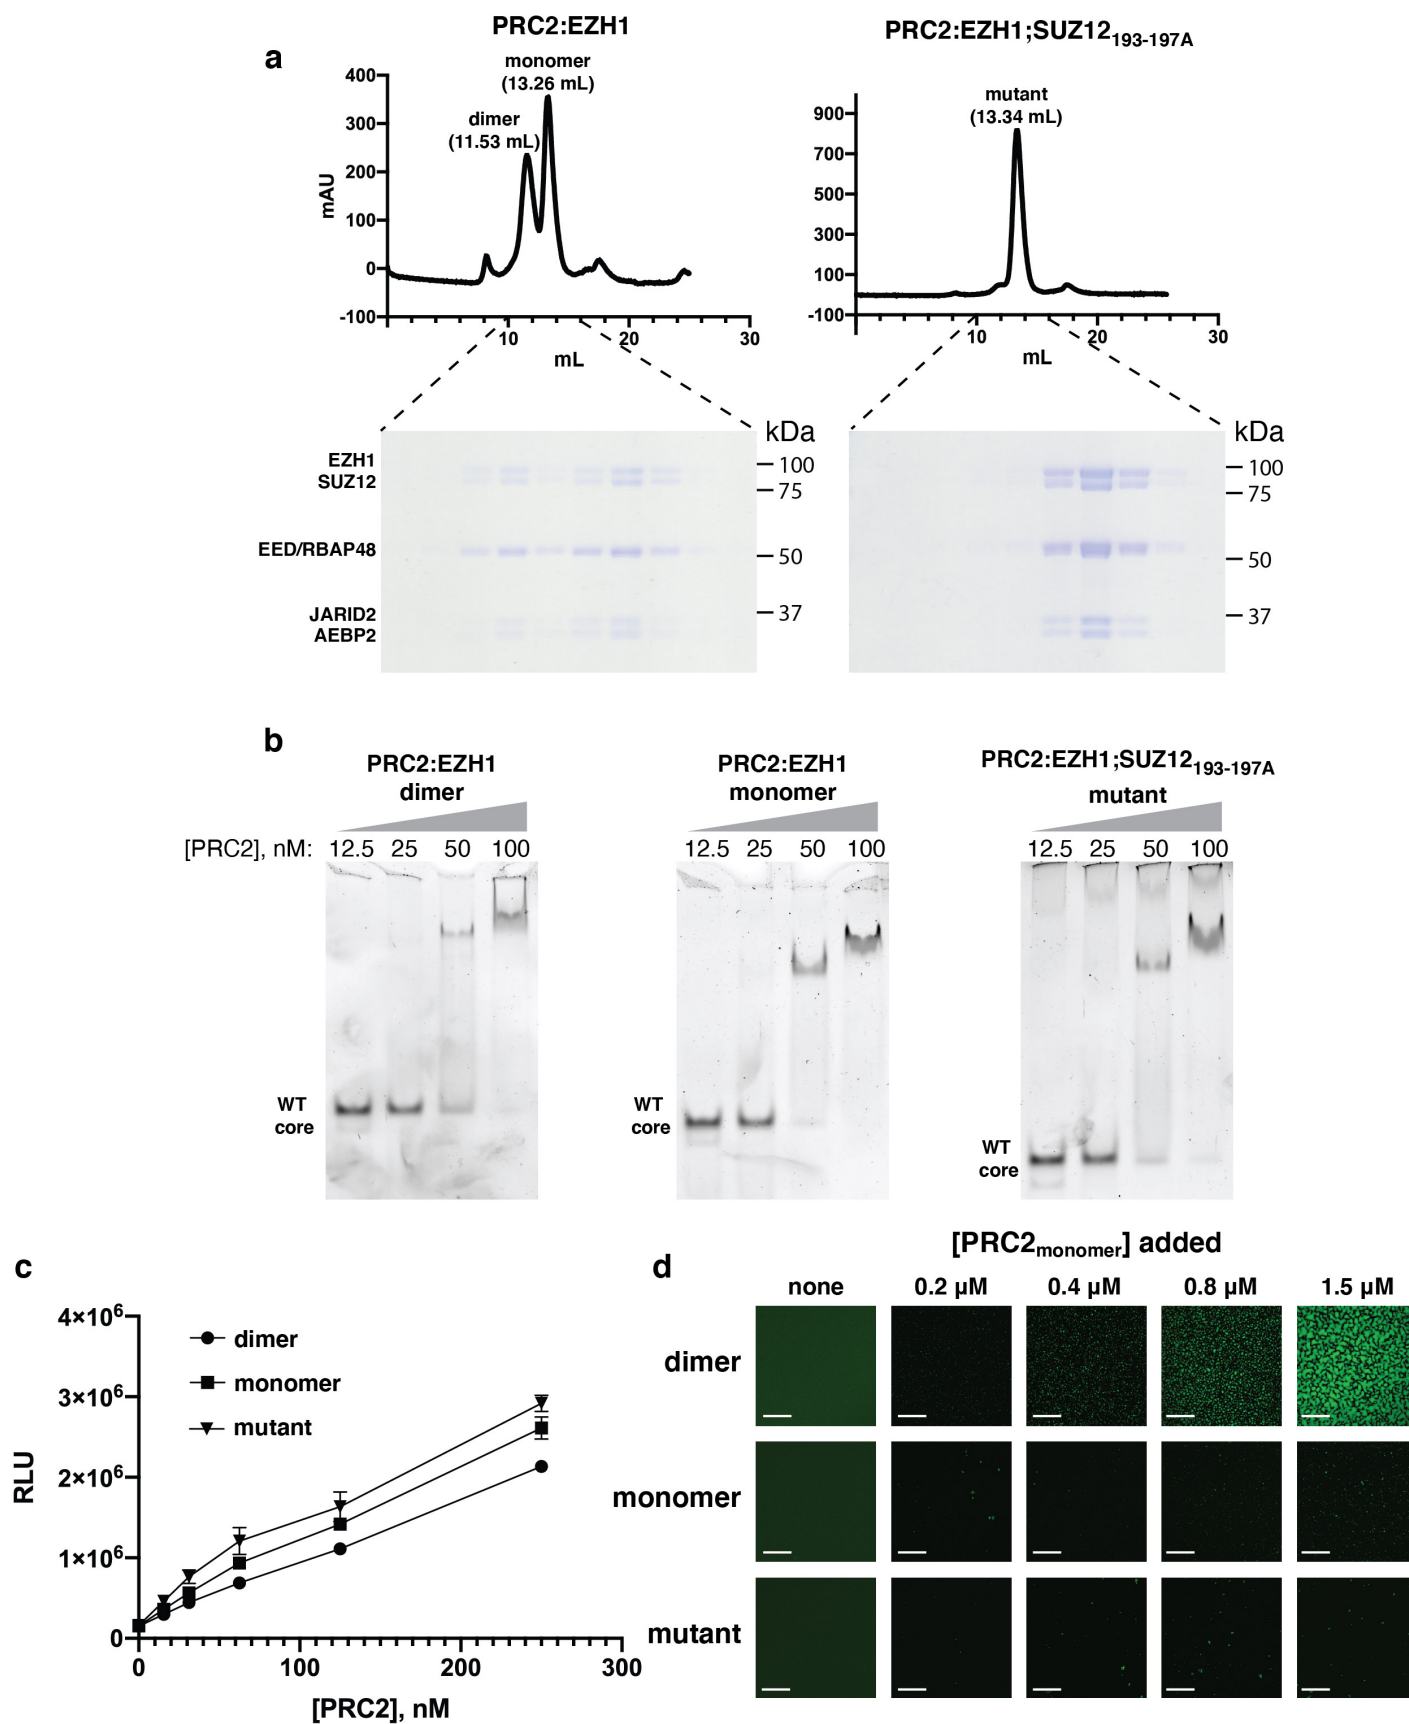

Supplementary Fig. 11: Comparison of PRC2:EZH1/2 dimers.

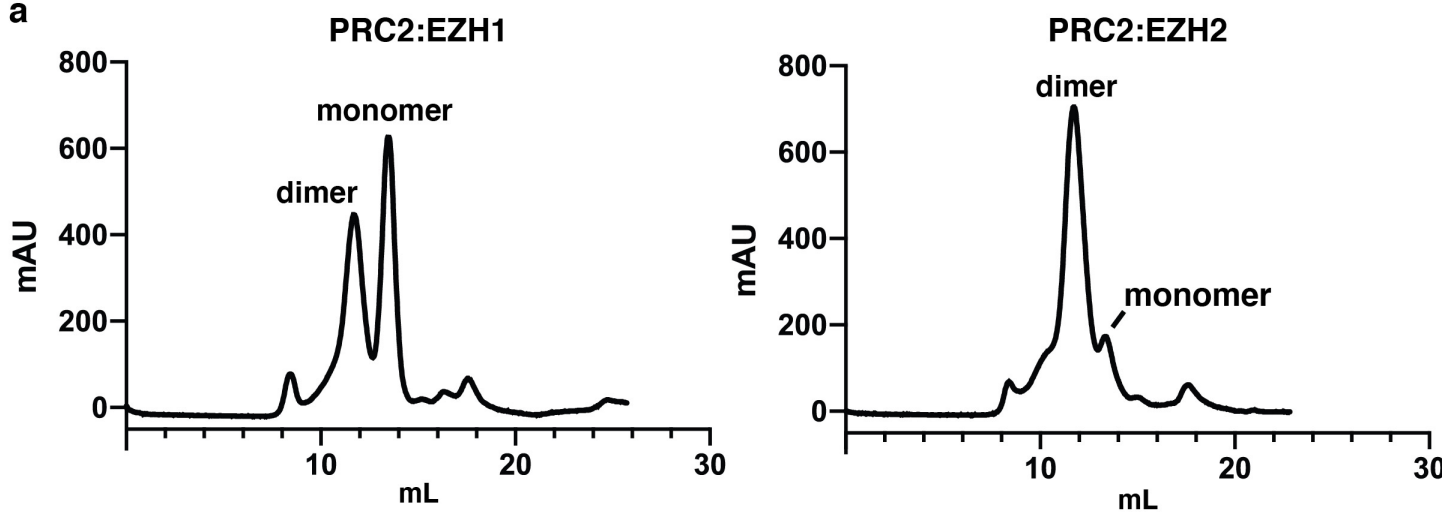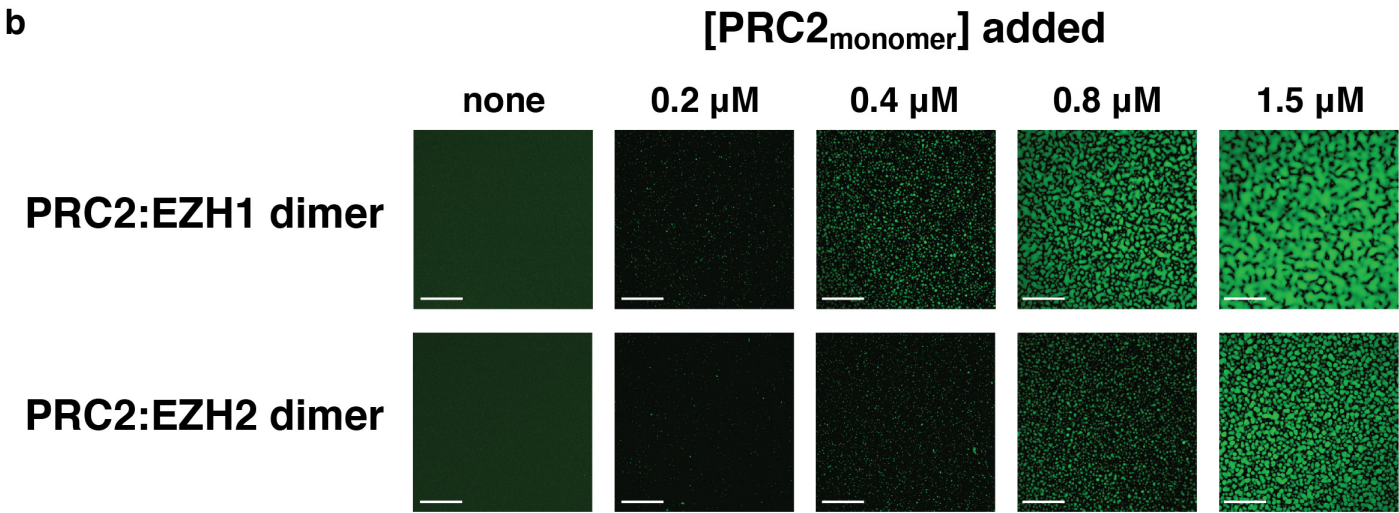

Supplement: 41467_2020_20775_MOESM1_ESM.pdf [file 41467_2020_20775_MOESM1_ESM.pdf]
